# Supplementary material for: An optimally tuned ensemble of the "eb_go_gs" configuration of GENIE: parameter sensitivity and bifurcations in the Atlantic overturning circulation
Source: Copernicus journal article supplement (doi:10.5194/gmd-6-1729-2013), 2013-10-21

Figure S1: Annual-mean air temperature and specific humidity differences – Point 18

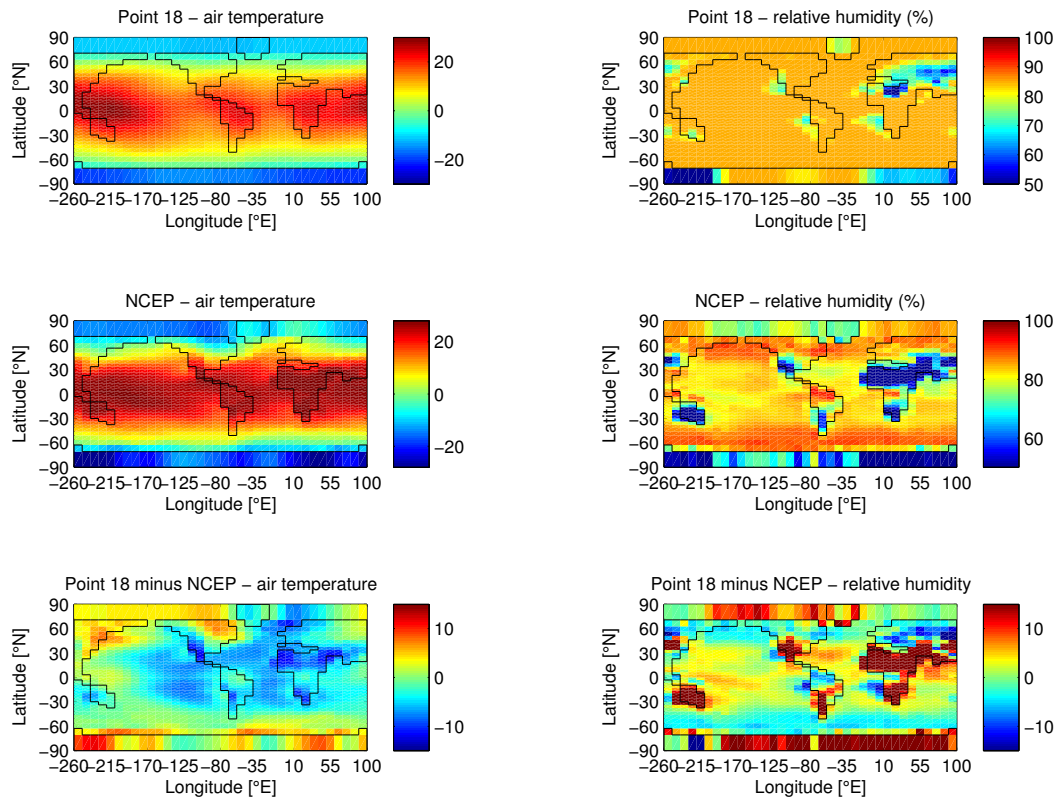

Figure S2: Annual-mean air temperature and specific humidity differences – Point 37

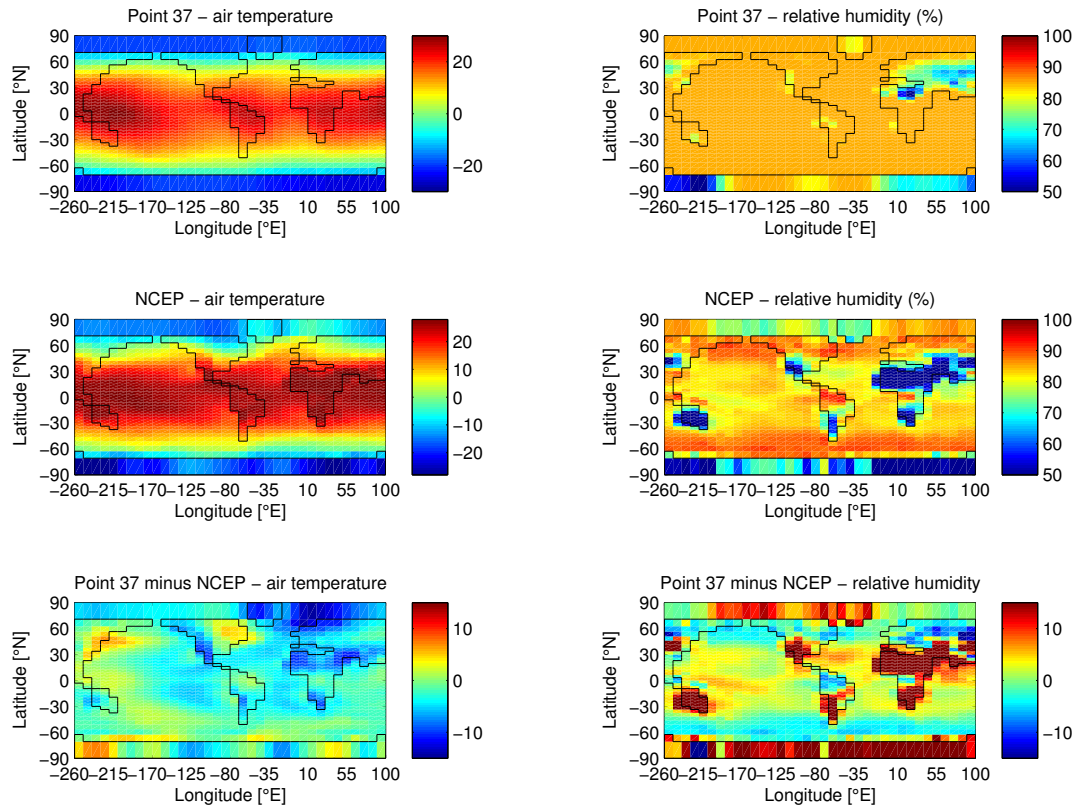

Figure S3: Annual-mean air temperature and specific humidity differences – Point 49

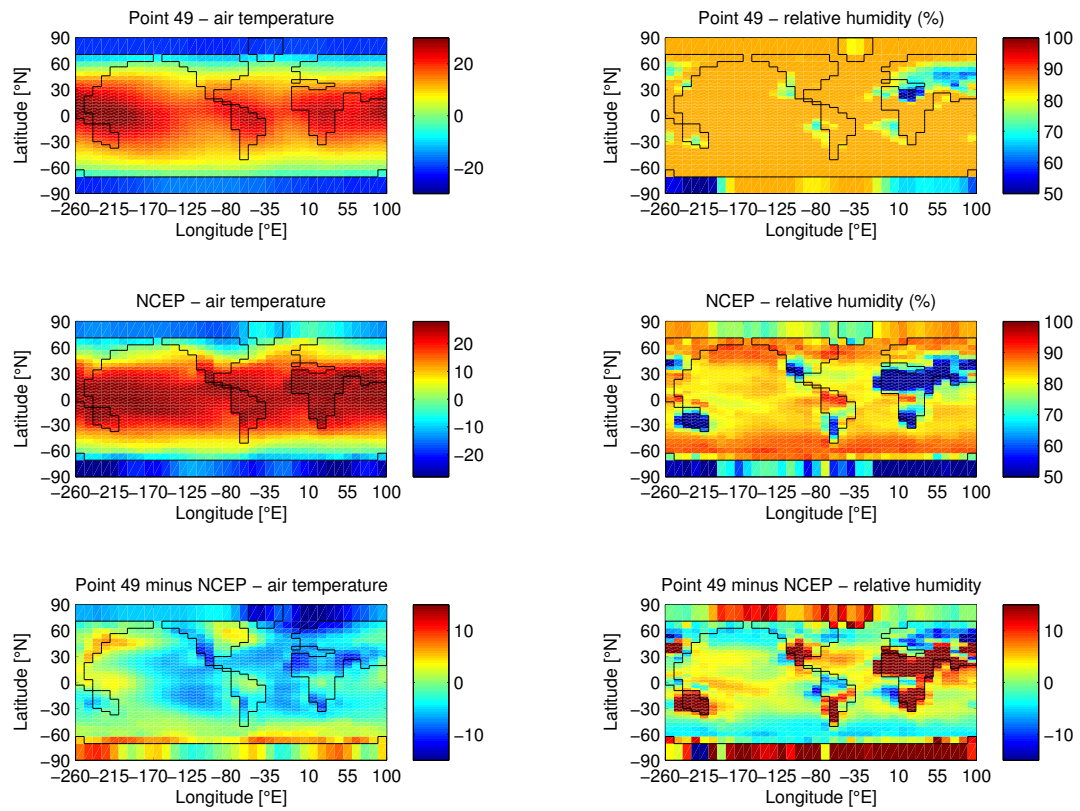

Figure S4: Annual-mean air temperature and specific humidity differences – Point 56

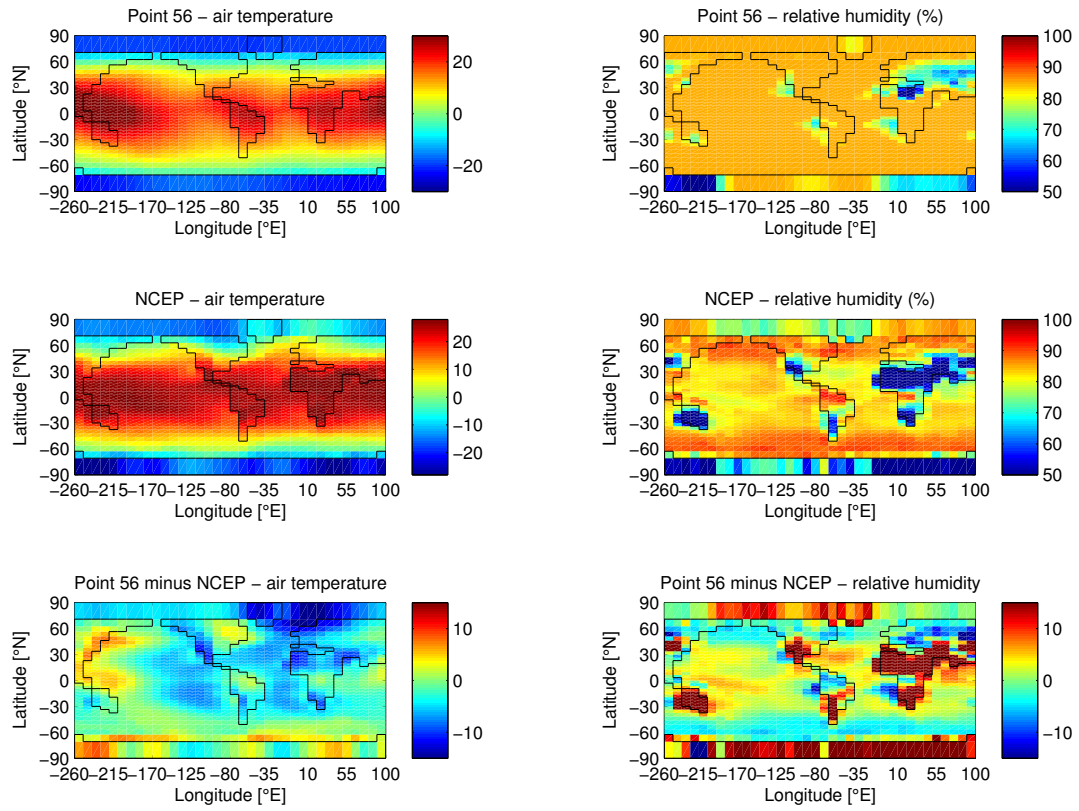

Figure S5: Annual-mean air temperature and specific humidity differences – Point 74

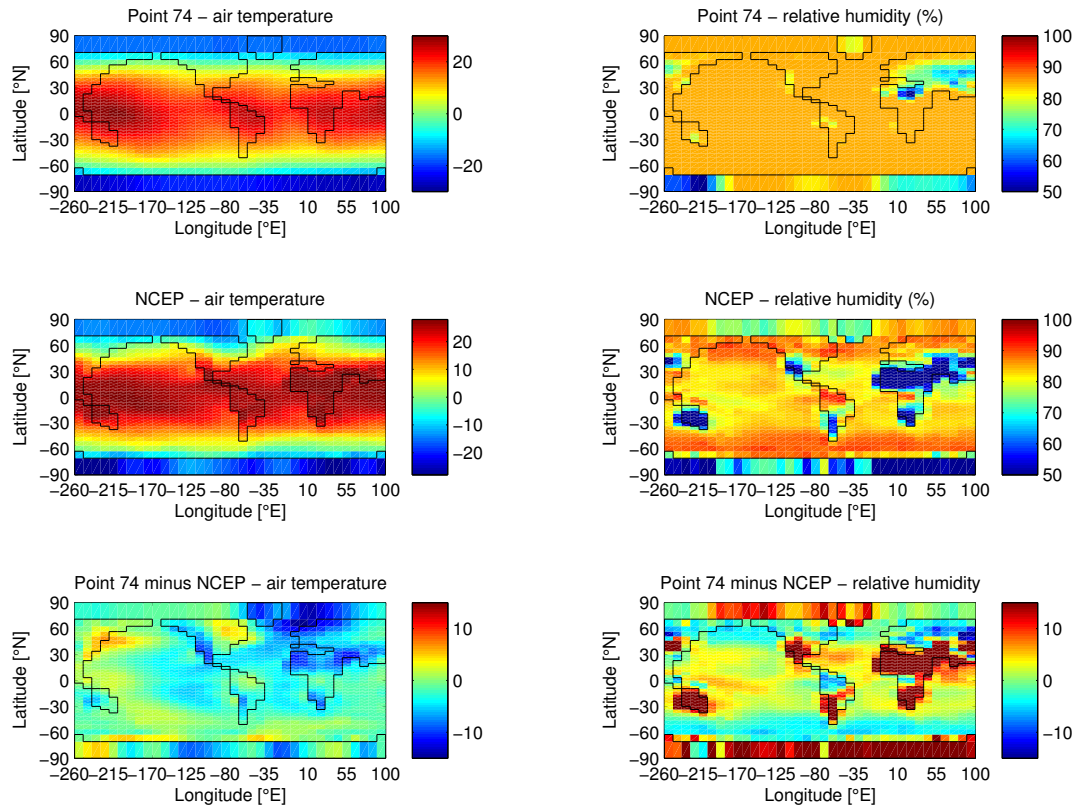

Figure S6: Annual-mean air temperature and specific humidity differences – GMD11

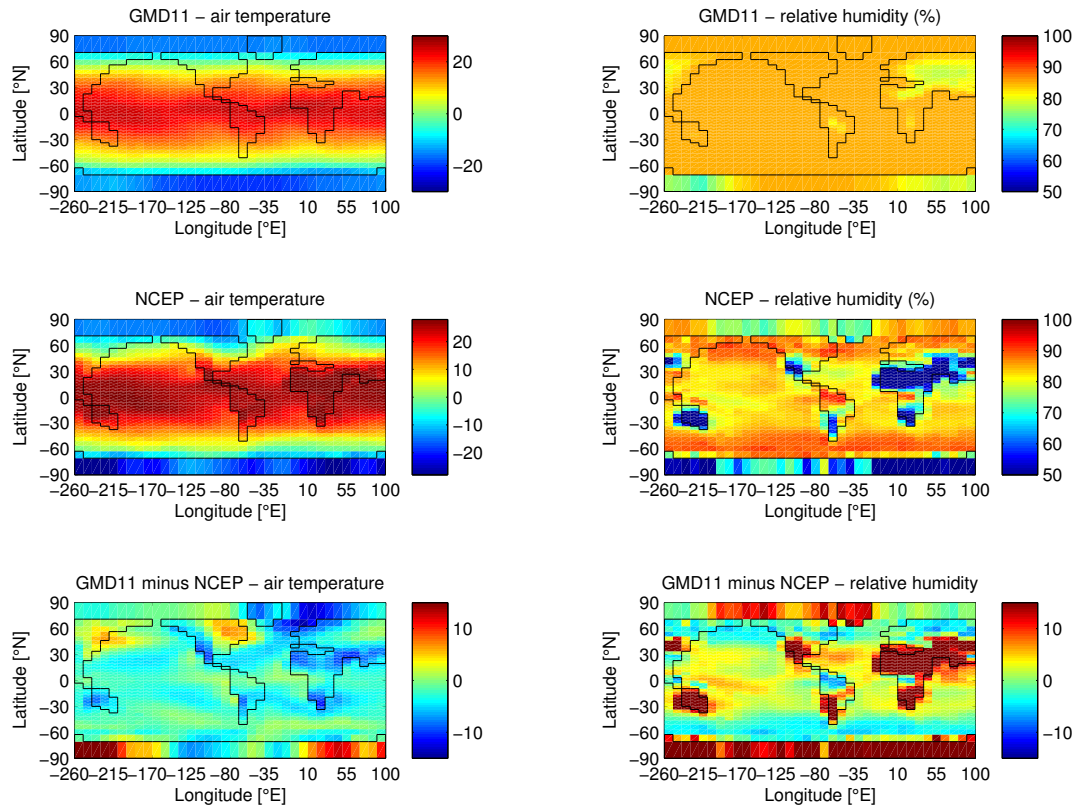

Figure S7: Annual-mean sea surface temperature and salinity differences – Point 18

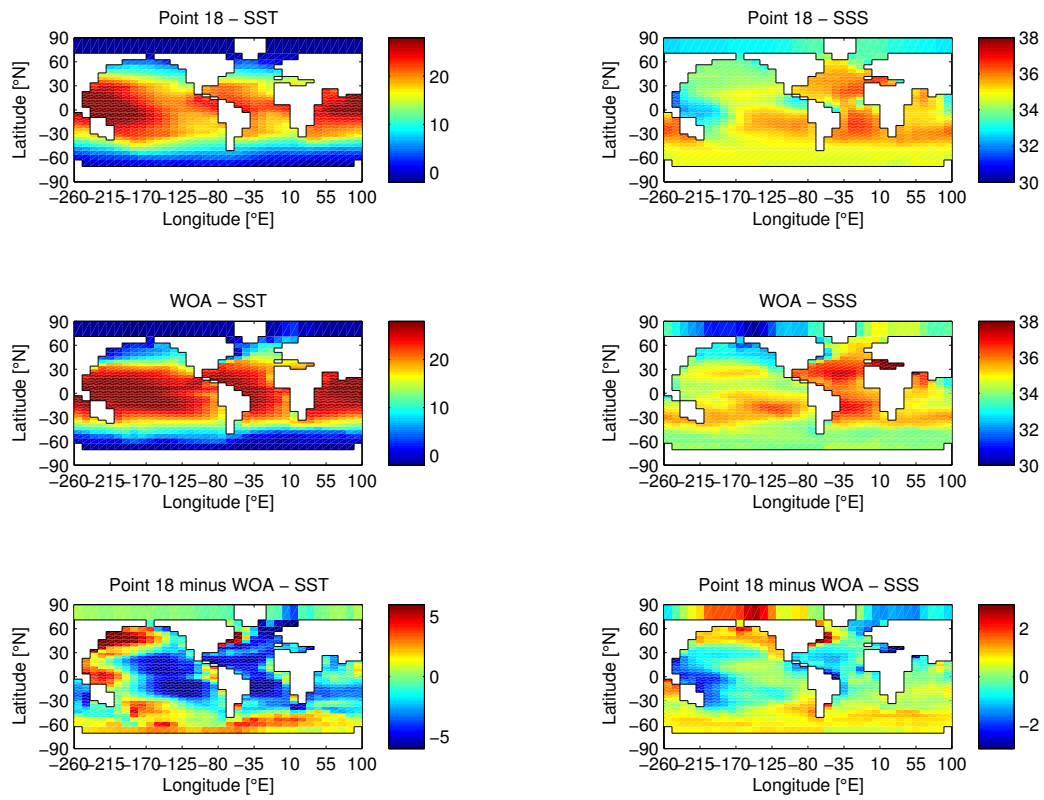

Figure S8: Annual-mean sea surface temperature and salinity differences – Point 37

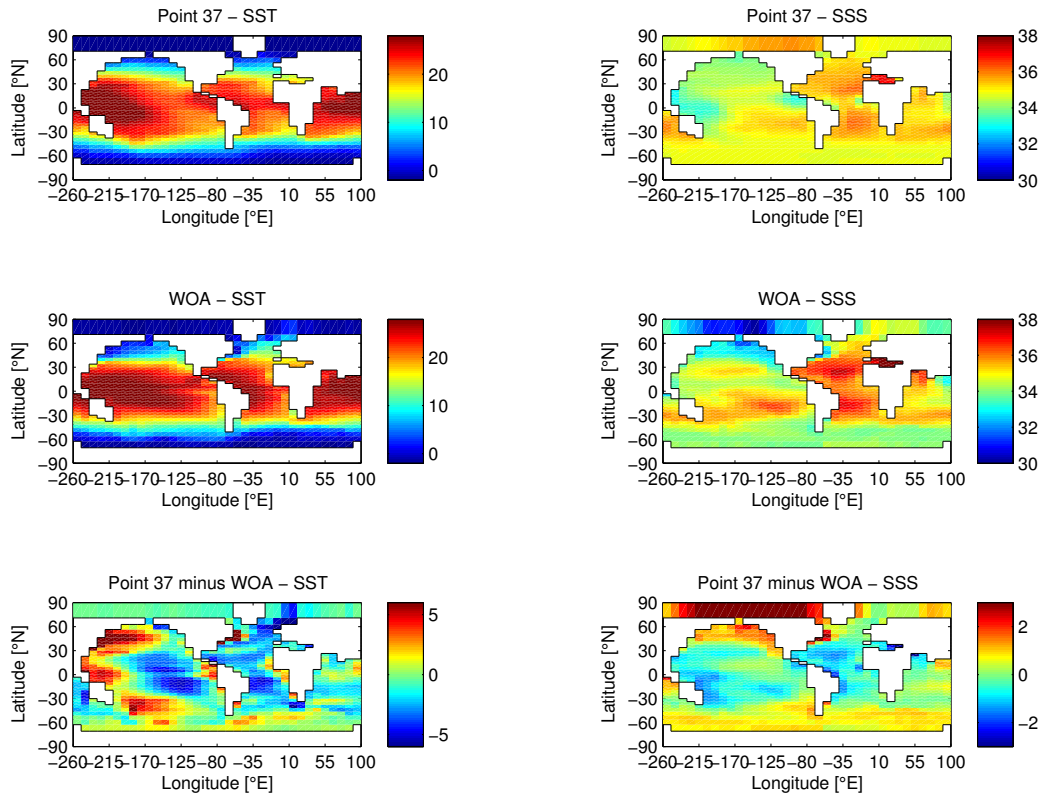



Figure S9: Annual-mean sea surface temperature and salinity differences – Point 49

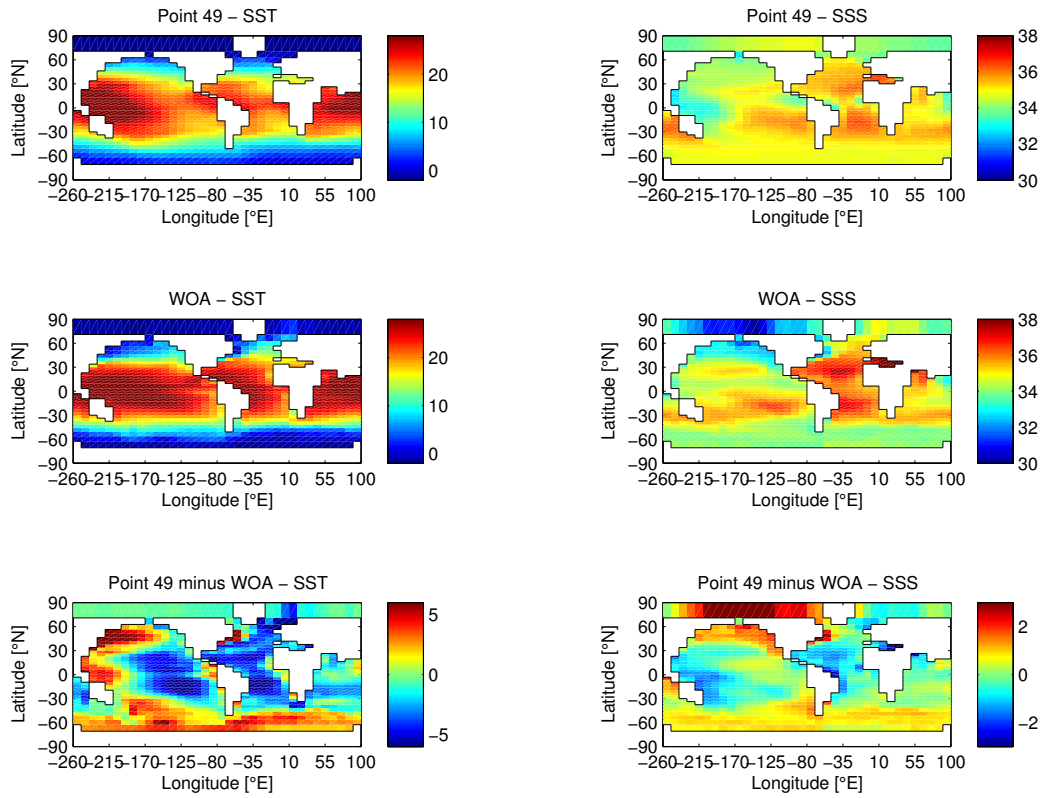

Figure S10: Annual-mean sea surface temperature and salinity differences – Point 56

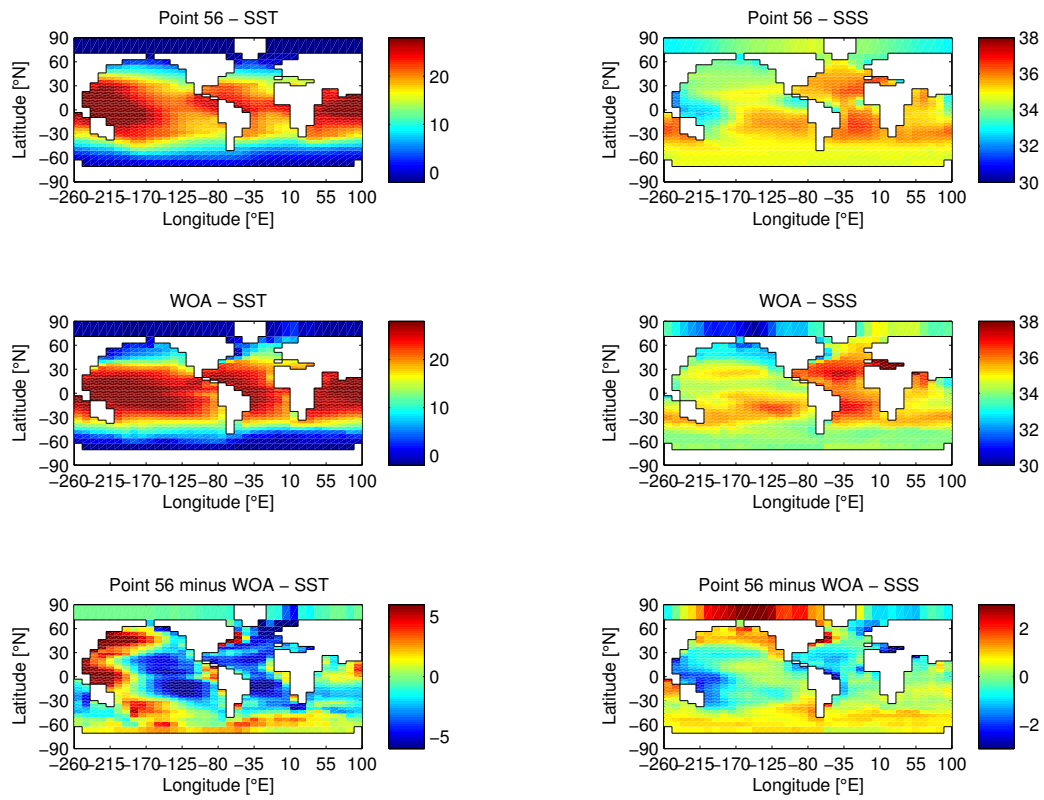

Figure S11: Annual-mean sea surface temperature and salinity differences – Point 74

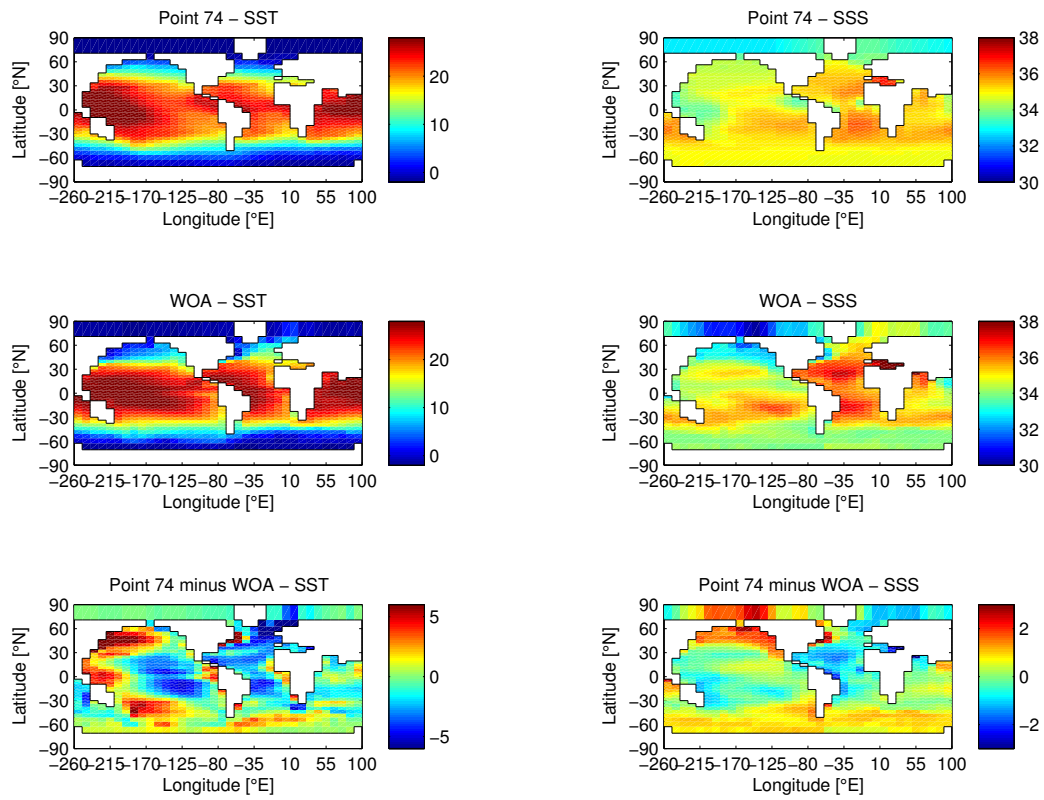

Figure S12: Annual-mean sea surface temperature and salinity differences – GMD11

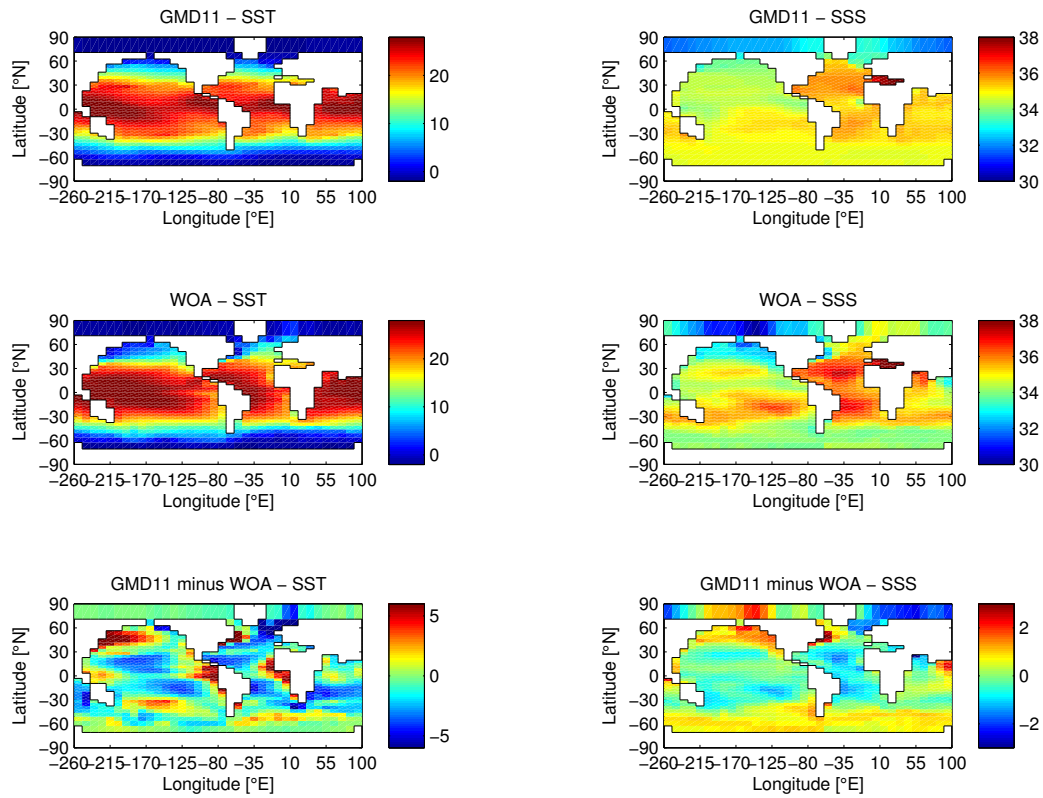

Figure S13: Annual-mean sea ice concentration – NCEP/NCAR re-analysis for 1986

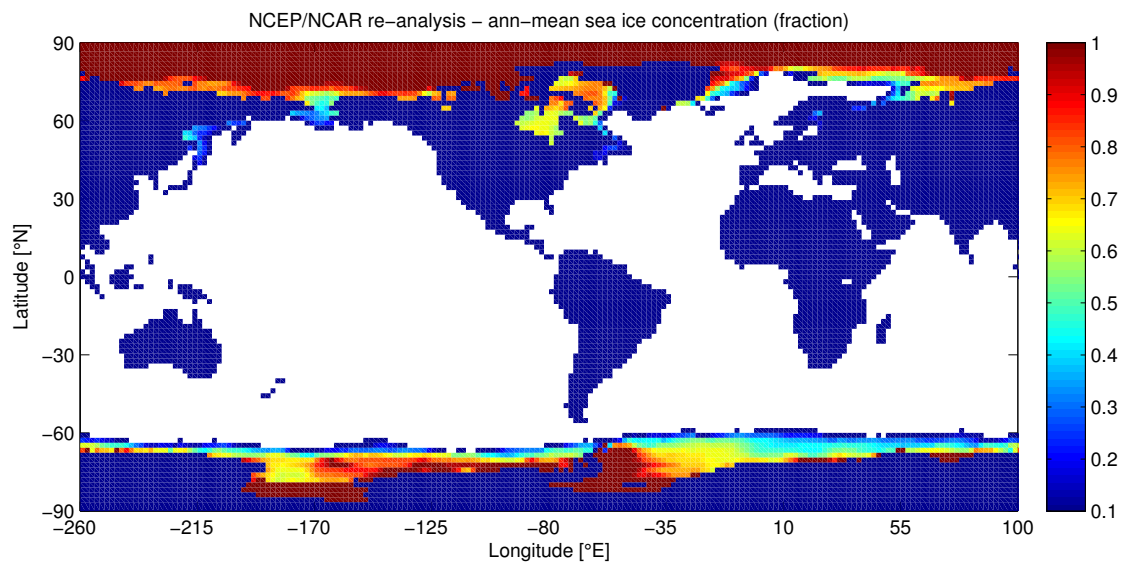

Supplement: Supplementary file 1 [file gmd-2012-74-suppl-figs.pdf › gmd-2012-74-suppl-figs.pdf]
